# Supplementary material for: Selective conversion of polyethylene wastes to methylated aromatics through cascade catalysis
Source: Royal Society of Chemistry journal article supplement (doi:10.1039/d3ey00011g), 2023-01-01
Supplement: d3ey00011g1.pdf [file d3ey00011g1.pdf]

## Supporting Information

### Materials and Methods

#### Materials

Polyethylene (PE) was supplied by Alfa Aesar (China) Chemical Co. Ltd. Tetrapropylammonium hydroxide (TPAOH, 25 wt%) was supplied by Shanghai Cairui Chemical Co. Ltd. Aluminum isopropoxide [Al(C<sub>3</sub>H<sub>7</sub>O)<sub>3</sub>] was purchased from Rhawn Co. Urea, pyridine, and zinc nitrate (Zn(NO<sub>3</sub>)<sub>2</sub>·6H<sub>2</sub>O) were obtained from Sino-Pharm Chemical Reagent Co. Ltd. Tetraethyl orthosilicate (TEOS), sodium hydroxide (NaOH), and CH<sub>2</sub>Cl<sub>2</sub> were purchased from Aladdin Industrial Co. N<sub>2</sub>, CH<sub>4</sub>, C<sub>3</sub>H<sub>6</sub>, and H<sub>2</sub>/Ar were supplied by Hangzhou Jingong Special Gas Co. Ltd. ZSM-5 zeolites was provided by Tianjin Nanhua Catalyst Ltd. These raw materials for preparing catalysts were analytical grade and used directly without further treatment.

#### Characterizations

X-ray diffraction (XRD) spectra of the zeolites were collected on a Rigaku Ultimate IV diffractometer with Cu curved monochromator and using Cu-K $\alpha$ -radiation ( $\lambda=1.5418$  Å). Nitrogen sorption isotherms were measured at -196 °C using a Micromeritics ASAP 2020M and 3020M system to calculate the micropore volume, external and specific surface area. The Brunauer-Emmett-Teller (BET) surface areas were calculated from the adsorption data. Surface areas were calculated using the BET equation. Micropore volume and external surface area were calculated using the t-plot method with the Jura-Harkins equation for determining the thickness of the adsorbed layer. The samples were previously outgassed at 300 °C for 3 h under vacuum before the measurements. The size and morphology of the zeolite crystals were determined by scanning electron microscopy (SEM) using a Hitachi SU-8010 electron microscopy. Transmission electron microscopy (TEM) and energy dispersive spectroscopy (EDS) elemental maps were performed on a Hitachi H-9500 electron microscope with an acceleration voltage of 200 kV. Si/Al ratios were measured with inductively coupled plasma (ICP) analysis over Perkin-Elmer 3300DV. Thermogravimetric analysis (TG) was obtained with a SDT Q600 V8.2 Build 100 instrument in air at a heating rate of 10 °C/min. Temperature-programmed desorption of ammonia (NH<sub>3</sub>-TPD) curve was carried out on a Micromeritics ChemiSorb 2720 Pulse Chemisorption System. The weighed sample (100 mg) was pretreated at 450 °C for 3 h under O<sub>2</sub> and 1 h under He, then cooled to 20 °C. The NH<sub>3</sub>-He (10 vol% NH<sub>3</sub>) gas was introduced at 100 °C for 1 h to ensure the saturation adsorption of NH<sub>3</sub>. The sample was then purged with He for 1 h until the signal returned to the baseline as monitored by a thermal conductivity detector (TCD). For the temperature-programmed oxidation (TPO) measurement, 20 mg of sample was sandwiched between quartz wool to prevent scattering and are subsequently packed into a quartz reaction tube. The quartz reaction tube was placed in an electric furnace. The samples were heated to 700 °C at a heating rate of 20 °C /min under a mixture atmosphere of 10%O<sub>2</sub>/He (flow rate: 10mL/ min). The carbon species of the sample were then released as CO<sub>2</sub> and measured on a mass spectrum (SRD200M, TILONGRP TECHNOLOGY LIMITED) instrument. Raman spectra were recorded using an HR800 Raman spectrometer equipped with an Ar excitation source ( $\lambda = 514.532$  nm). <sup>1</sup>H and <sup>13</sup>C NMR of the liquid product spectra were recorded on Bruker Avance-500 (500 MHz) spectrometer and were analyzed using MestReNova. Chemical shifts ( $\delta$ , ppm) were calibrated using the residual proton signals of the solvent and referenced to tetramethyl silane (TMS,  $\delta=0$  ppm).

#### Product analysis

*Gas chromatography.* The liquid and gaseous products were obtained by the cold bath and gas collector, respectively, and then analyzed by GC and further confirmed by GC-MS (diluted with CH<sub>2</sub>Cl<sub>2</sub>). After the reaction, the reaction tube and cold bath were washed with CH<sub>2</sub>Cl<sub>2</sub> to collect all the liquid products, and an internal standard was added to

analyze the liquid products using a gas chromatography (Fuli-1690) equipped with a flame ionization detector (FID) and HP-5 column. The gaseous products in the gas collector were analyzed by gas chromatography (Fuli-1690) equipped with a flame ionization detector (FID) and PLOT-Al<sub>2</sub>O<sub>3</sub> column, using methane as an internal standard. The gaseous products were analyzed both before and after injecting the methane internal standard to avoid the influence of methane products from the polymer depolymerization. The products were further confirmed by GC-MS analysis (SHIMADZU-GCMS-QP2010SE).

We used two internal standards of mesitylene and bromobenzene for quantifying the product yields, which provided the same data within error bounds, confirming the accuracy of product analysis following these methods. The details for quantifying liquid products are in the following.

(i) method using mesitylene internal standard

After the reaction, the liquid products were collected in a cold bath, the content of each component in the was analyzed by GC with mesitylene as an internal standard. The mixture was analyzed using GC before and after adding the mesitylene, and their yields were calculated as follows:

$$\text{Yield} = \frac{\sum \Delta m * f * S_i / \Delta S}{m_{PE}}$$

Where  $\Delta m$  is the mass of the internal mesitylene,  $f$  is relative correction factor (mass basis),  $S_i$  is the area of hydrocarbon molecule with carbon number at  $i$ , while  $\Delta S$  is the area difference of mesitylene before and after adding to the internal, and  $m_{PE}$  is mass of the initial reactant PE.

$\Delta S$  was calculated following a peak-area-normalization method to avoid influence by difference in each sample injection to GC, following the equation

$$\Delta S = S'_{mesitylene} - \frac{S_{toluene}}{S'_{toluene}} \times S_{mesitylene}$$

$S_{mesitylene}$  and  $S'_{mesitylene}$  is the area of mesitylene before and after adding the internal.  $S_{toluene}$  and  $S'_{toluene}$  is the area of toluene before and after adding the internal.

(ii) method using bromobenzene internal standard

To verify the accuracy of the above calculation, another internal bromobenzene was added, where the of each component could be directly obtained following the general internal standard method. The yield of each products in the liquid was calculated as

$$\text{Yield} = \frac{\sum \Delta m' * f' * S_i / S_{Br}}{m_{PE}}$$

Where  $\Delta m'$  is mass of the internal bromobenzene,  $f'$  is relative correction factor (mass basis),  $S_i$  is the area of hydrocarbon molecule with carbon number at  $i$ , while  $S_{Br}$  is the area of bromobenzene, and  $m_{PE}$  is mass of the initial reactant PE.

*NMR spectroscopy.* Spectra of the products were recorded in CHCl<sub>3</sub>-d<sub>2</sub>. <sup>1</sup>H and <sup>13</sup>C NMR of the liquid product spectra were recorded on Bruker Avance-500 (500 MHz) spectrometer and were analyzed using MestReNova. Chemical shifts ( $\delta$ , ppm) were calibrated using the residual proton signals of the solvent and referenced to tetramethyl silane (TMS,  $\delta=0$  ppm).

*Catalytic conversion of C<sub>3</sub>H<sub>6</sub>.* The reaction was carried out in a fixed-bed reactor. All the catalyst was sieved through a 40–60 mesh. 400 mg of quartz sand and 400 g of catalyst were physically mixed and localized within the middle of the reaction tube, which was heated to (400 ± 5) °C under N<sub>2</sub> (at a constant atmospheric pressure) in a quartz tube. Then, 10% C<sub>3</sub>H<sub>6</sub>/90% N<sub>2</sub> was induced to the reactor with a flow rate at 10 mL/min, which lasted for 4 h. The temperature of the catalyst bed was maintained at (400 ± 5) °C. The products were separated by a condensing collector. The liquid and gaseous products were obtained by the cold bath and gas collector, respectively, and then analyzed by

GC and further confirmed by GC-MS (diluted with CH<sub>2</sub>Cl<sub>2</sub>). C<sub>3</sub>H<sub>6</sub> conversion was calculated by the internal standard method with methane.

### Thermodynamic analysis of aromatization

The thermodynamic feasibility of the reaction was assessed using data computed from the Benson group increment theory. Increment values are compiled in Table S2. According to the additivity of group properties,<sup>[1-3]</sup> the alkane group values ( $g_{A,n}$ ) decreased with the increase of molecular number ( $n$ ), in which case the group values of linear polyethylene is very low (S1). According to the results of GPC, the number-average molecular weight of the PE is about 28481 g mol<sup>-1</sup>, so  $n$  is about 2000.

The thermodynamic contributions to a linear alkane C<sub>n</sub>H<sub>2n+2</sub> are as follows:

$$g_{A,n}=(n-2)g_1+2g_2 \quad (S1)$$

Compared with alkanes, there is a comparatively large number of values of the heats of formation of alkenes.

The thermodynamic contributions to a linear light olefin C<sub>m</sub>H<sub>2m</sub> are as follows:

$$g_{A,m}^-(m-4)g_1 + g_2 + g_3 + g_4 + g_5 \quad (S2)$$

The enthalpy of methylated aromatics is much higher than that of the alkanes and alkenes. Take xylene for example, the thermodynamic contributions are as follows:

$$g_x = 2g_2 + 2g_6 + 4g_7 + g_8 \quad (S3)$$

For the direct conversion of polyethylene to xylene (eq 1), the thermodynamic contributions are as follows:

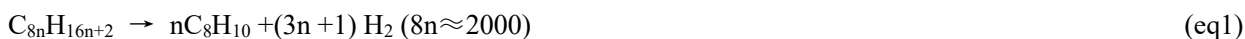

$$g_{Ar,x} = (3n+1)g_H + 2n g_2 + 2ng_6 + 4ng_7 + ng_8 - (8n-2)g_1 - 2g_2 = n(3g_H + 2g_2 + 2g_6 + 4g_7 + g_8 - 8g_1) + g_H - 2g_2 + 2g_1 \quad (S4)$$

For the conversion of light olefin to xylene, for example, butene (eq 2), the thermodynamic contributions are:

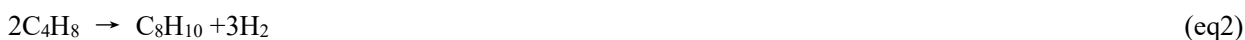

$$g_{Ar,y} = 3g_H + 2g_2 + 2g_6 + 4g_7 + g_8 - 2(g_2 + g_3 + g_4 + g_5) = 3g_H - 2g_3 - 2g_4 - 2g_5 + 2g_6 + 4g_7 + g_8 \quad (S5)$$

For propylene (eq 2), the thermodynamic contributions are as follows:

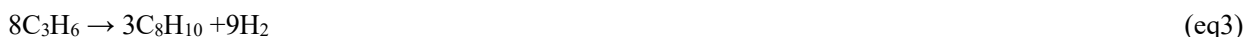

$$g_{Ar,y} = 9g_H + 6g_2 + 6g_6 + 12g_7 + 3g_8 - 8(g_2 + g_3 + g_4) = 9g_H - 2g_2 - 8g_3 - 8g_4 + 6g_6 + 12g_7 + 3g_8 \quad (S5)$$

Without H<sub>2</sub>, the thermodynamic contributions for the alkane cracking reaction are as follows:

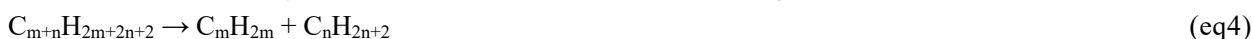

$$g_{m,n} = g_{A,m}^- + g_{A,n} - g_{A,m+n} = -4g_1 + g_2 + g_3 + g_4 + g_5 \quad (S9)$$

For the hydrogenation of light olefin to alkanes, for example, butene (eq 5), the thermodynamic contributions are as follows:

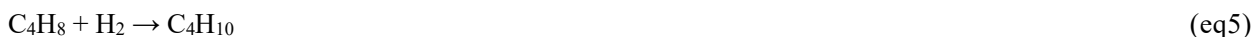

$$g_H = g_1 + g_2 - g_3 - g_4 \quad (S10)$$

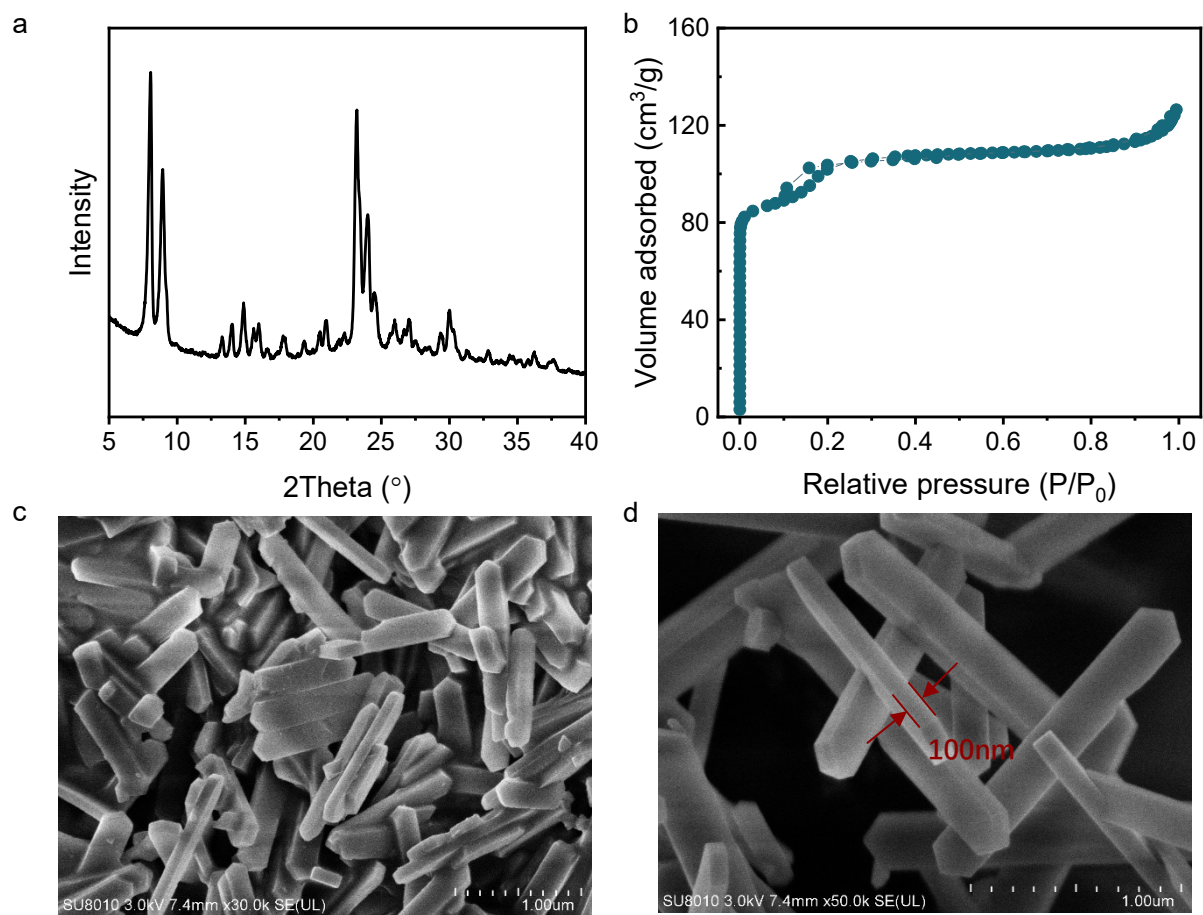

**Figure S1.** (a) XRD pattern, (b) N<sub>2</sub> sorption isotherms, and (c,d) SEM images of *s*-ZSM-5. The surface area was 390.7 m<sup>2</sup>/g.

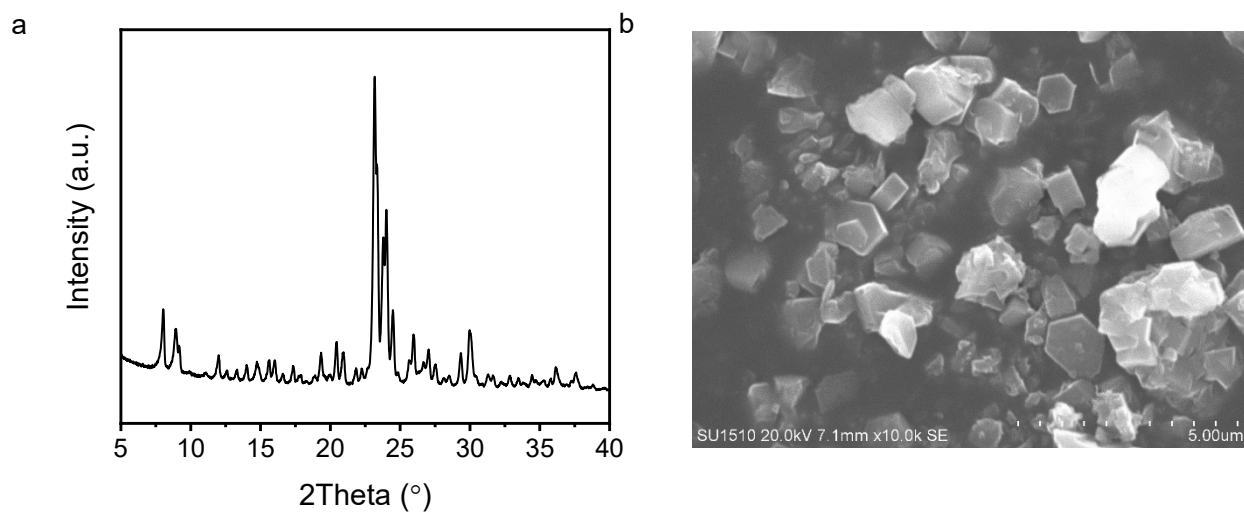

**Figure S2.** (a) XRD pattern and (b) SEM image of Zn/ZSM-5.

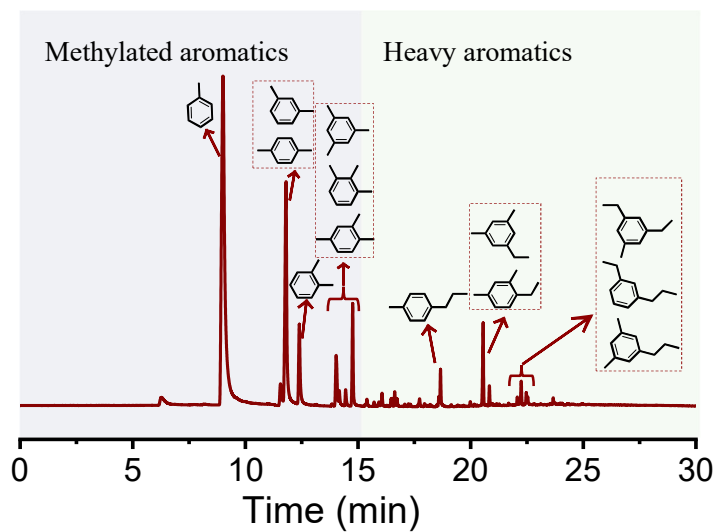

**Figure S3.** GC curves analyzing the liquid products for *s*-ZSM-5 and Zn/ZSM-5 catalyst. Reaction conditions: 500 mg of PE, 100 mg of *s*-ZSM-5, and 400 mg of Zn/ZSM-5, feed gas of 3.3% H<sub>2</sub>/29.7% Ar/67% N<sub>2</sub>, a flow rate of 3 mL/min, 400 °C, reaction for 4 h.

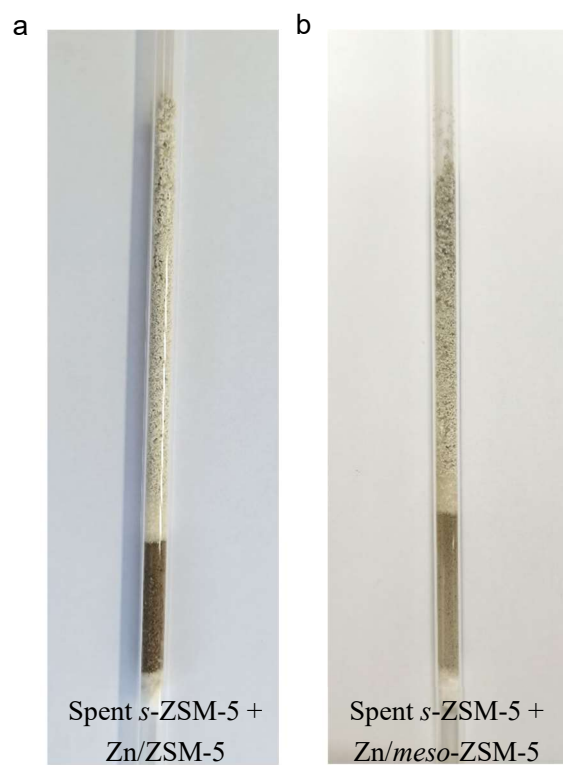

**Figure S4.** Photographs of the spent (a) *s*-ZSM-5+Zn/ZSM-5, (b) *s*-ZSM-5+Zn/*meso*-ZSM-5. Reaction conditions: the mixture of 500 mg of PE and 100 mg of *s*-ZSM-5 in the first bed, 400 mg of catalyst for aromatization in the second bed, feed gas of 3.3% H<sub>2</sub>/29.7% Ar/67% N<sub>2</sub>, a flow rate of 3 mL/min, 400 °C, 4 h.

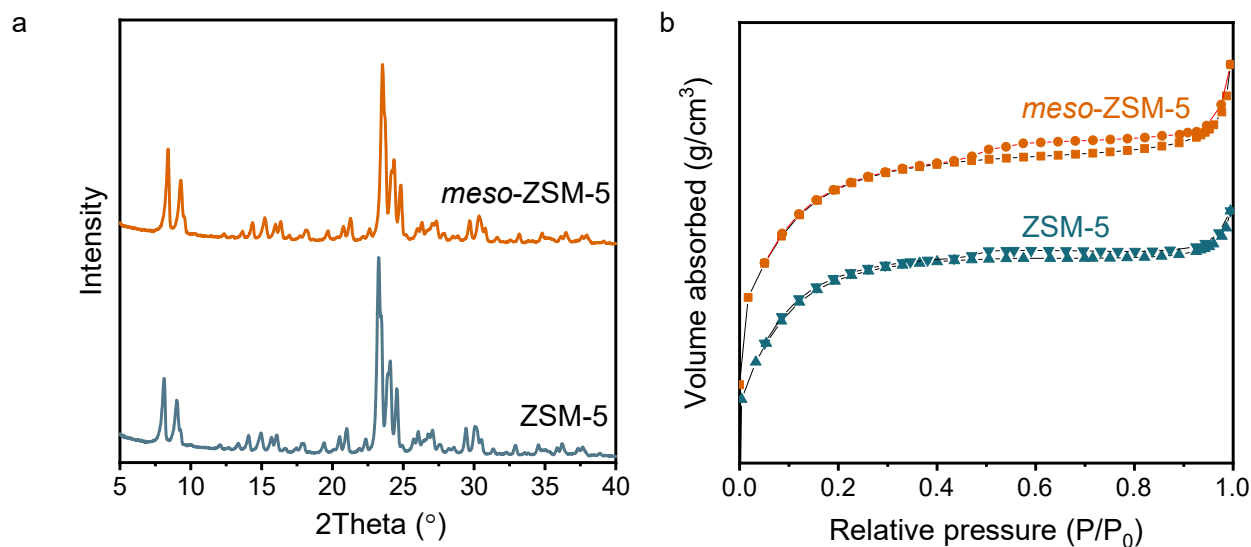

**Figure S5.** (a) XRD patterns and (b) N<sub>2</sub> sorption isotherms of ZSM-5 and *meso*-ZSM-5 zeolite. The surface areas of ZSM-5 and *meso*-ZSM-5 zeolite were 327.7 m<sup>2</sup>/g and 370.9 m<sup>2</sup>/g

**Note:** As shown in Figure S6a, in both tests by mixing the PE feed with *meso*-ZSM-5 (mono-bed) and packing *meso*-ZSM-5 under the mixture of PE and *s*-ZSM-5 (dual-bed), low yields of aromatics were obtained. This phenomenon is due to the rapid coke formation in the *meso*-ZSM-5 zeolite (Figure S6b and S6c), which failed to efficiently catalyze the aromatization step.



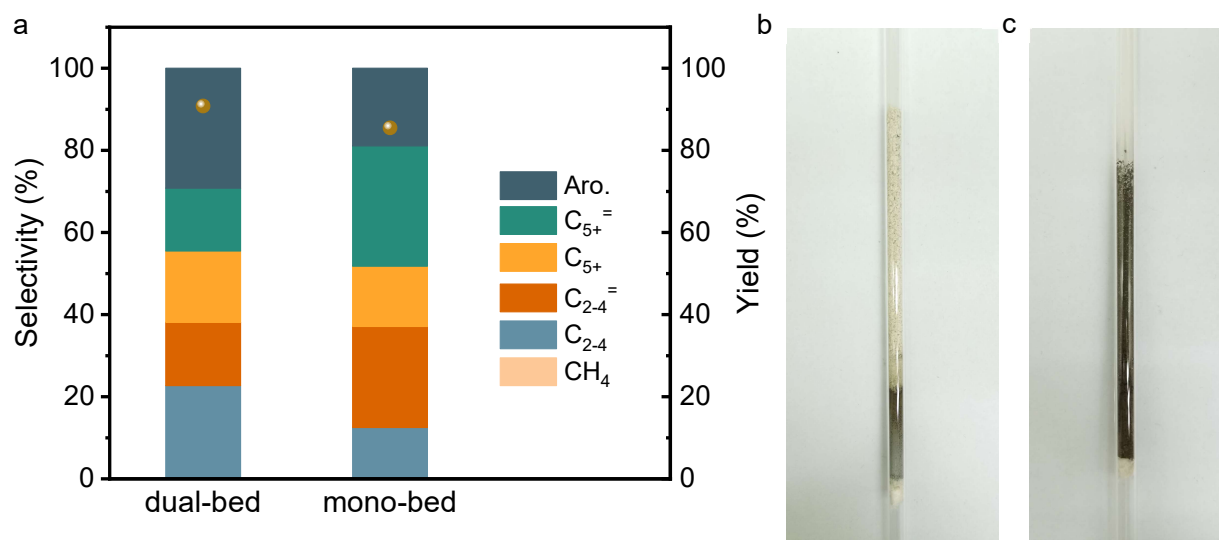

**Figure S6. (a)** Data characterization of polyethylene aromatization over *s*-ZSM-5 and *meso*-ZSM-5 catalysts. The dual-bed reaction conditions: a mixture of 500 mg of PE and 100 mg of *s*-ZSM-5 in the first bed, 400 mg of *meso*-ZSM-5 for aromatization in the second bed, feed gas of 3.3% H<sub>2</sub>/29.7% Ar/67% N<sub>2</sub>, a flow rate of 3 mL/min, 400 °C, 4h. The mono-bed reaction conditions: a mixture of 500 mg of PE and 100 mg of *meso*-ZSM-5, feed gas of 3.3% H<sub>2</sub>/29.7% Ar/67% N<sub>2</sub>, a flow rate of 3 mL/min, 400 °C, 4h. Photographs of the spent (b) *s*-ZSM-5+ *meso*-ZSM-5 and (c) *meso*-ZSM-5 catalysts after the tests.

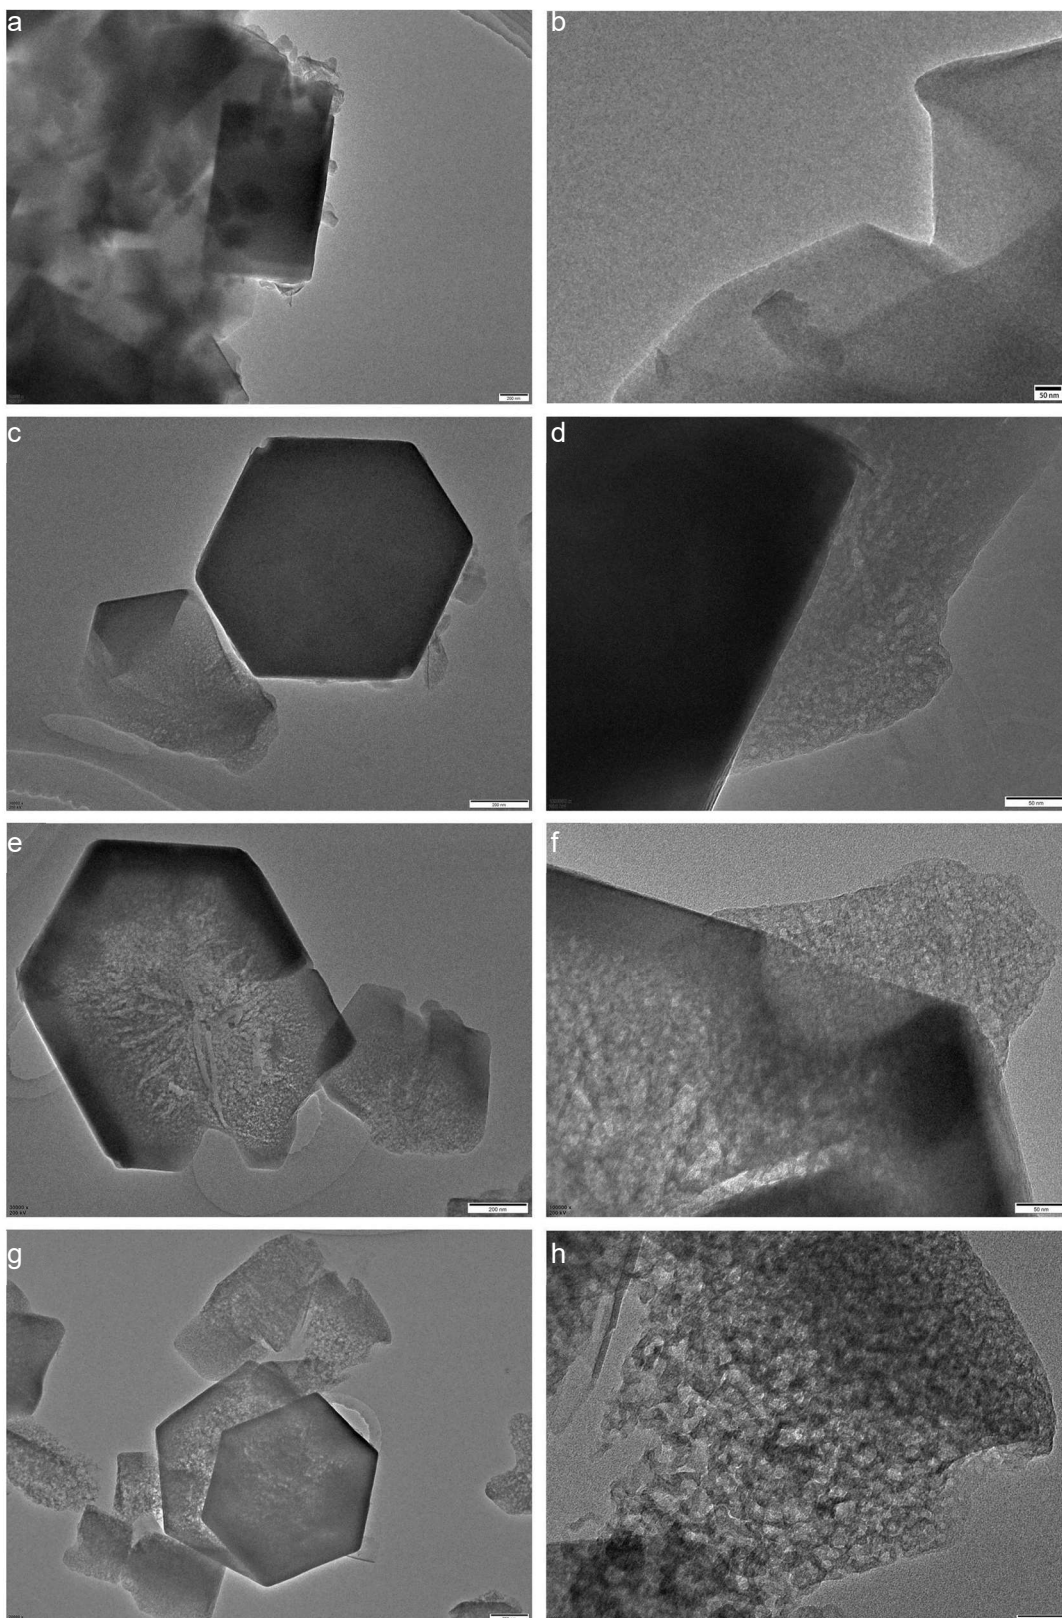

**Figure S7.** TEM images of (a, b) commercial ZSM-5, and this zeolite treated by (c, d) 0.2 M NaOH, (e, f) 0.5 M NaOH, and (g, h) 0.8 M NaOH aqueous solution.

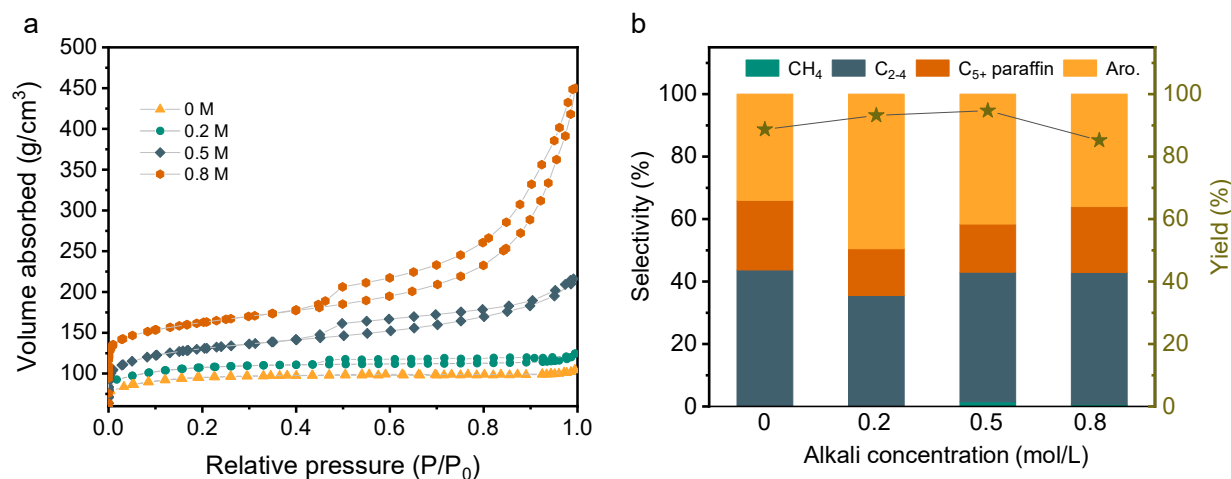

**Figure S8.** (a) N<sub>2</sub> sorption isotherms of ZSM-5 and *meso*-ZSM-5 zeolite treated with different NaOH concentrations. (b) Data characterization of the aromatization of PE over Zn/*meso*-ZSM-5 zeolite treated with different NaOH concentrations. Reaction conditions: the mixture of 500 mg of PE and 100 mg of *s*-ZSM-5 in the first bed, 400 mg of Zn/*meso*-ZSM-5 treated with different NaOH concentrations in the second bed, feed gas of 3.3% H<sub>2</sub>/29.7% Ar/67%N<sub>2</sub>, a flow rate of 3 mL/min, 400 °C, 4h.

**Note:** Even with the nitrogen sorption parameters of the *meso*-ZSM-5 was not changed so obviously, it still exhibited enhanced performances compared with the commercial ZSM-5 in the cascade catalysis. Similar phenomena are in good agreement with that in the previous study.<sup>4-8</sup> For example, Ma and co-workers obtained the *meso*-ZSM-5 by a treatment using 0.1 M aqueous NaOH solution, resulting in the sample with similar nitrogen sorption parameters but different performances in the syngas-to-aromatics conversion.<sup>5</sup> Svelle reported that the textural properties of ZSM-5 were not obviously changed after treatment by 0.05 M aqueous NaOH solution, but an obviously increased selectivity for C<sub>6+</sub> products and a longer lifetime was achieved in the conversion of methanol.<sup>7</sup>

In addition, we further performed the alkaline treatment of ZSM-5 zeolite using 0.5 and 0.8 M aqueous NaOH solution, which is sufficient to get the *meso*-ZSM-5 with more mesopores that result in more obviously changed nitrogen sorption parameters (Figure S8a and Table S1). For example, the mesopore volumes were increased to 0.17 and 0.36 cm<sup>3</sup>/g by treatment using 0.5 and 0.8 M aqueous NaOH solution, respectively. We studied their performances in the PE conversion by combining them with *s*-ZSM-5 zeolite in cascade catalysis. The yield of aromatics in the test using *meso*-ZSM-5 treated with 0.5 and 0.8 M aqueous NaOH solution was still lower than that with 0.2 M aqueous NaOH solution, because the aromatization was influenced by both porosity and acidity (Figures S7b and S9). For example, the treatment with 0.8 M aqueous NaOH solution formed the most mesopores among these samples, but the acids were seriously lost because of the damage to the zeolite framework by desilication. As a result of catalysis, the *meso*-ZSM-5 obtained using 0.8 M NaOH gave a lower yield to aromatic products. This trend is also in good agreement with the previous results in aromatization.<sup>9-13</sup>

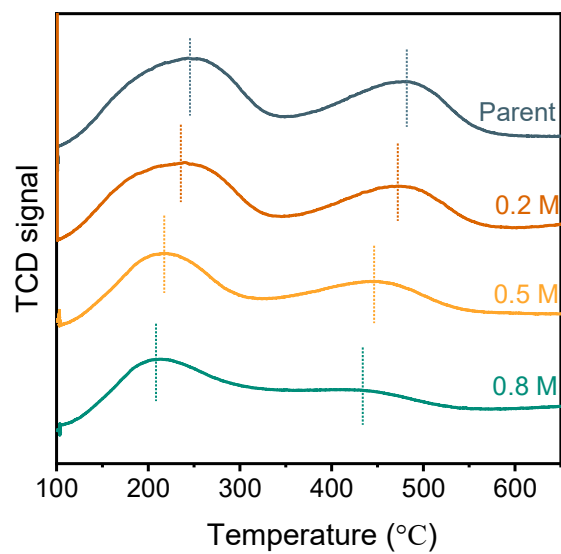

**Figure S9.** NH<sub>3</sub>-TPD profiles of *meso*-ZSM-5 treated with different concentrations of aqueous NaOH solution.

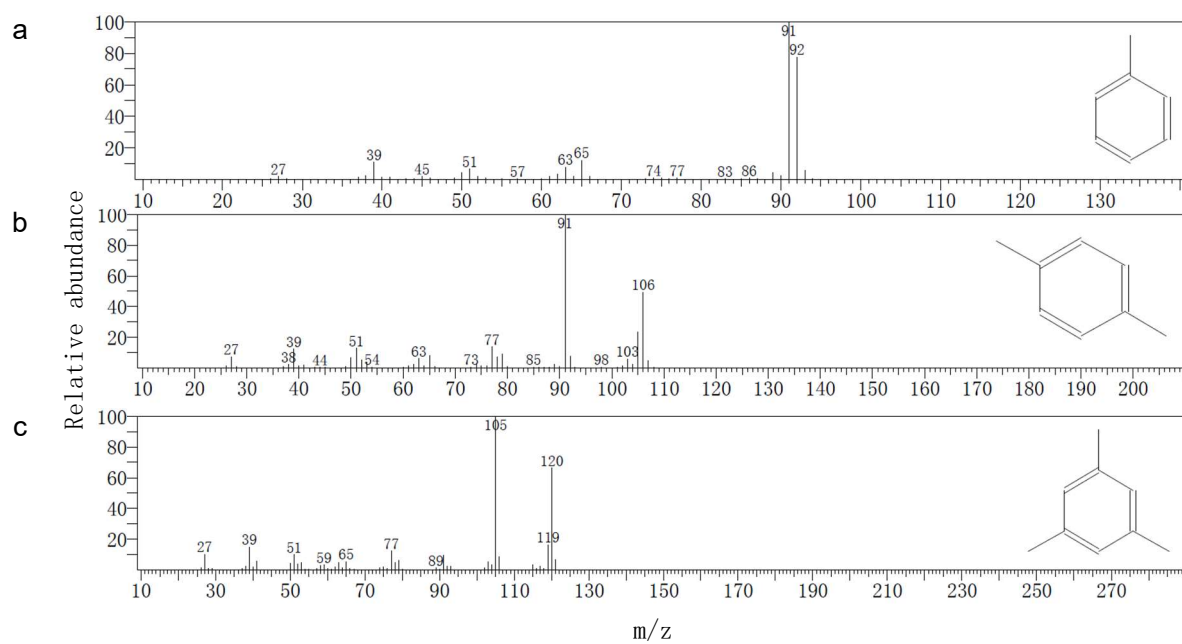

**Figure S10.** GC-MS analysis of the main products of (a) toluene, (b) xylene, and (c) mesitylene.

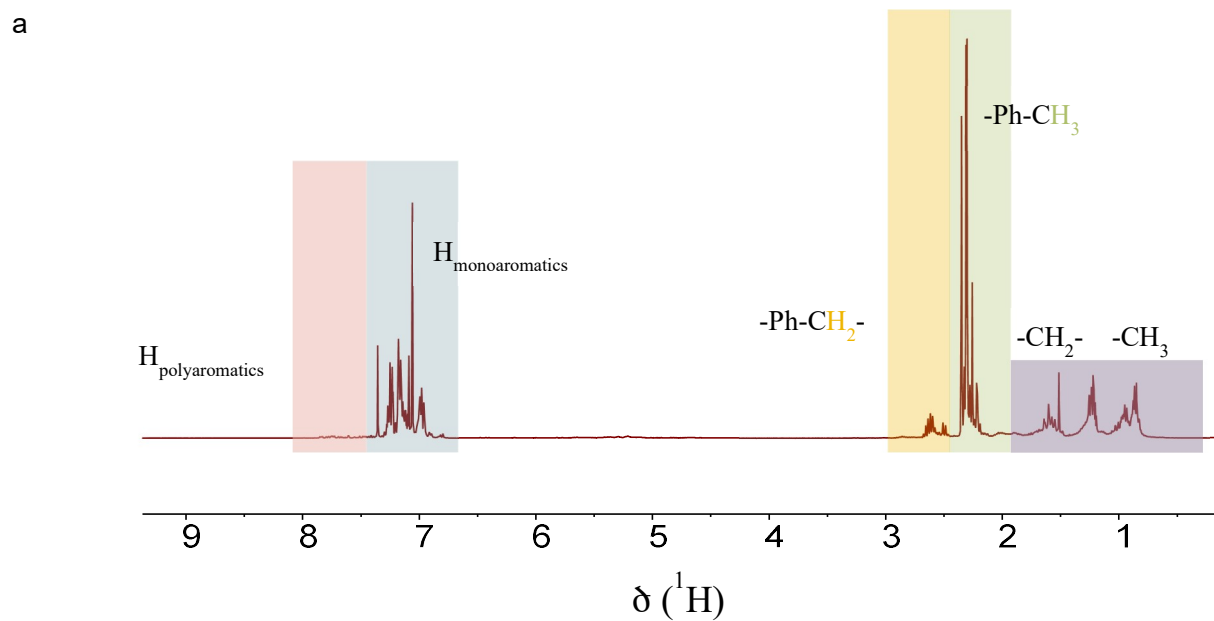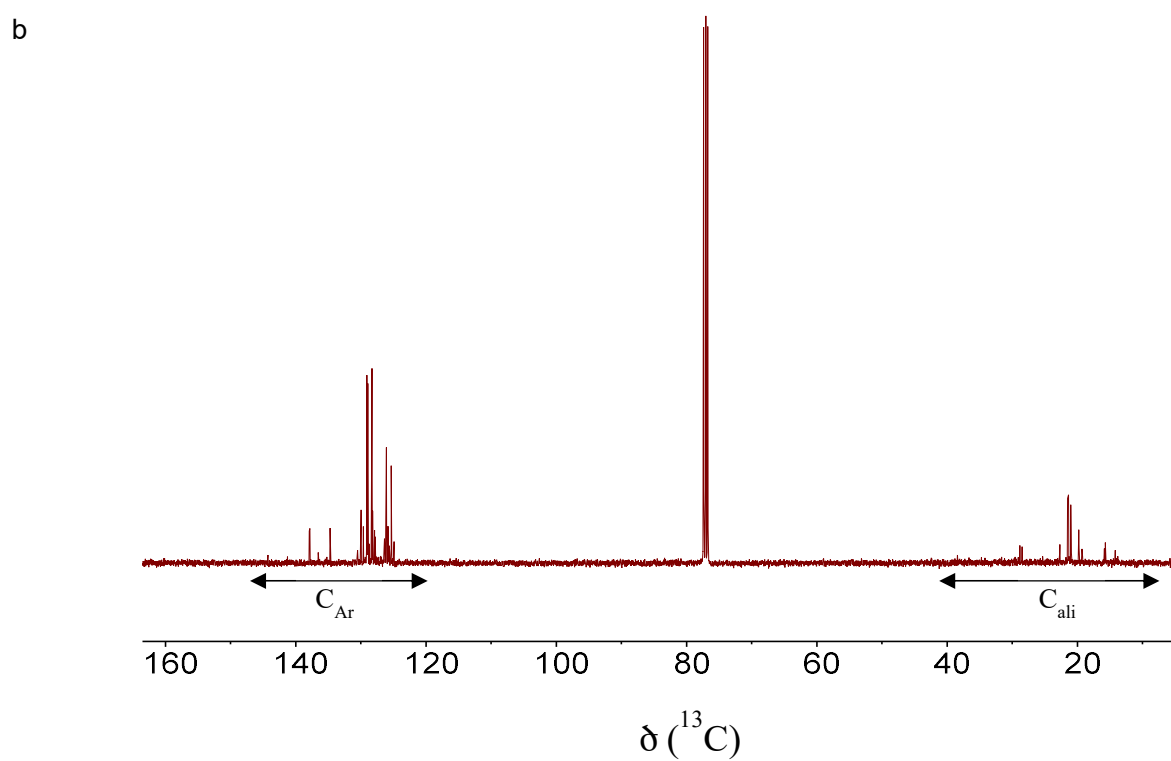

**Figure S11.** (a)  $^1\text{H}$  and (b)  $^{13}\text{C}$  NMR spectra of the liquid product.

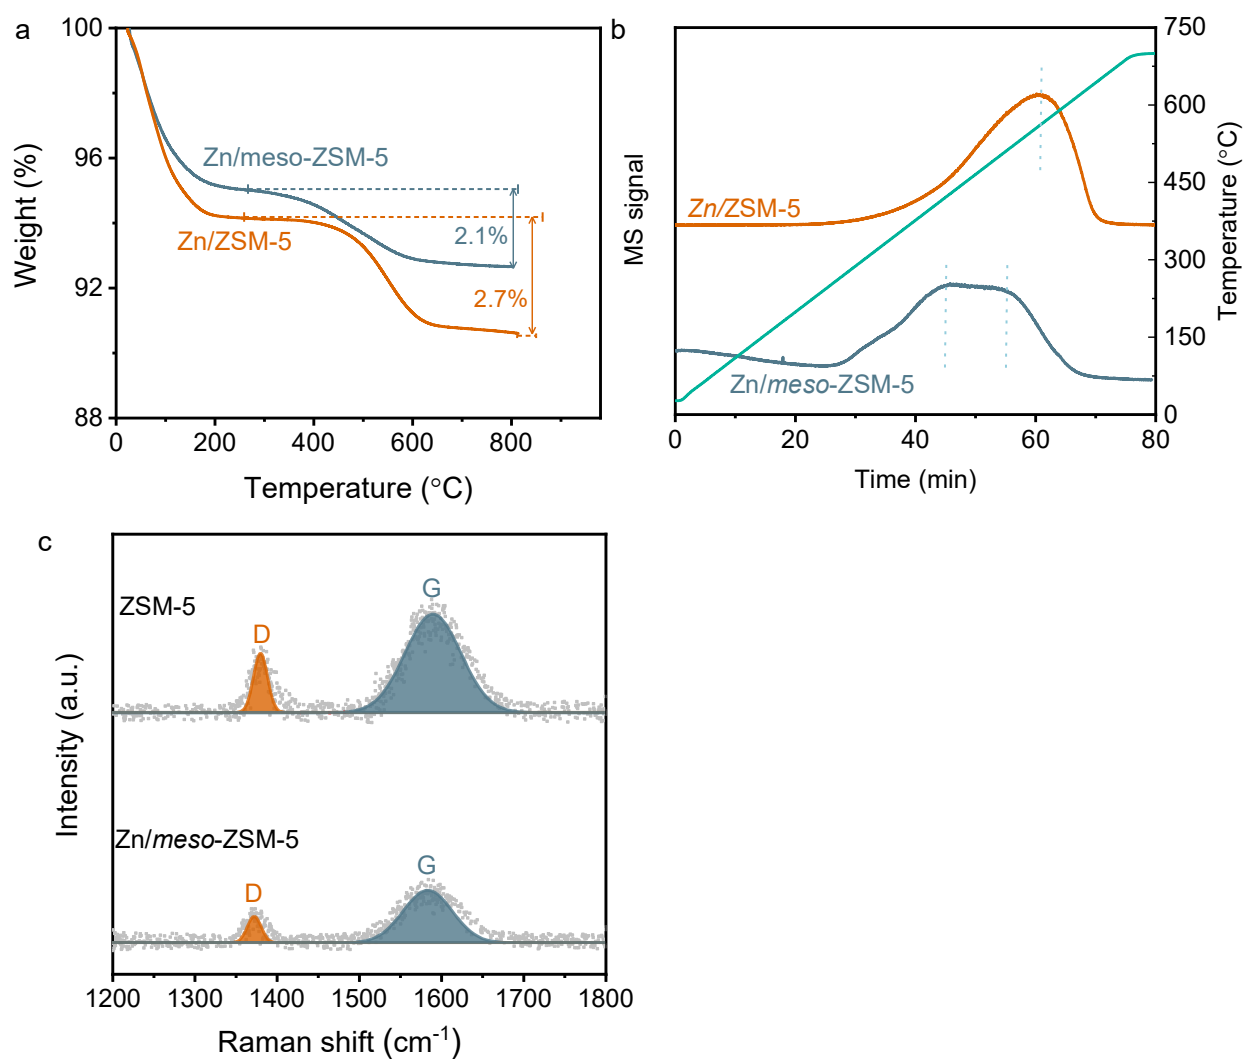

**Figure S12.** (a) TG and (b) TPO profiles of the used Zn/ZSM-5 and Zn/meso-ZSM-5. (c) Raman spectra of the spent Zn/meso-ZSM-5 catalyst with ZSM-5 catalyst as a reference. Reaction conditions: the mixture of 500 mg of PE and 100 mg of *s*-ZSM-5 in the first bed, 400 mg of catalyst for aromatization in the second bed, feed gas of 3.3% H<sub>2</sub>/29.7% Ar/67% N<sub>2</sub>, a flow rate of 3 mL/min, 400 °C, 4 h.

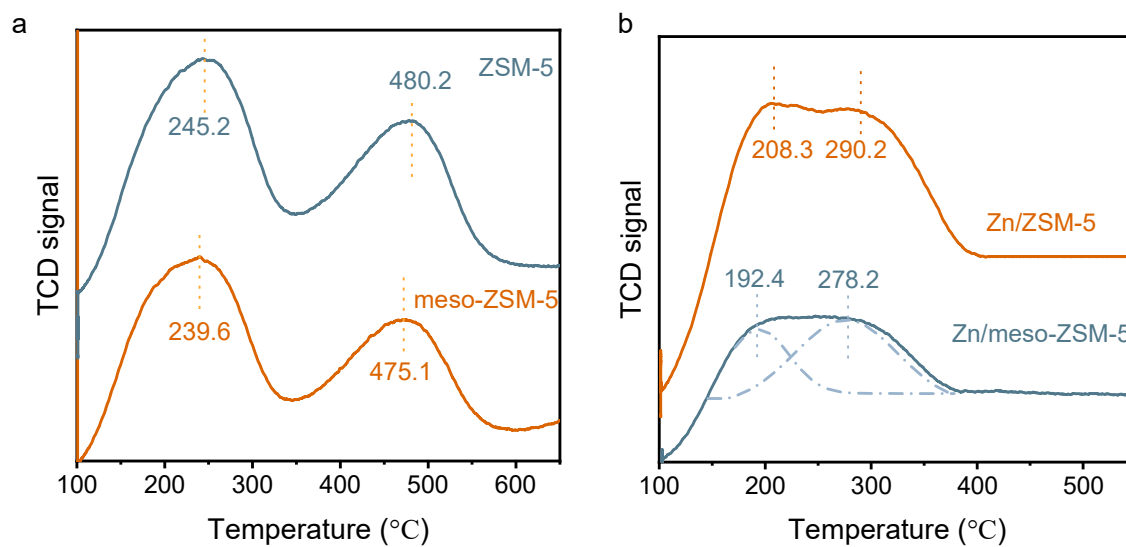

**Figure S13.** NH<sub>3</sub>-TPD profiles of (a) *meso*-ZSM-5 and ZSM-5, (b) Zn/ZSM-5 and Zn/*meso*-ZSM-5.



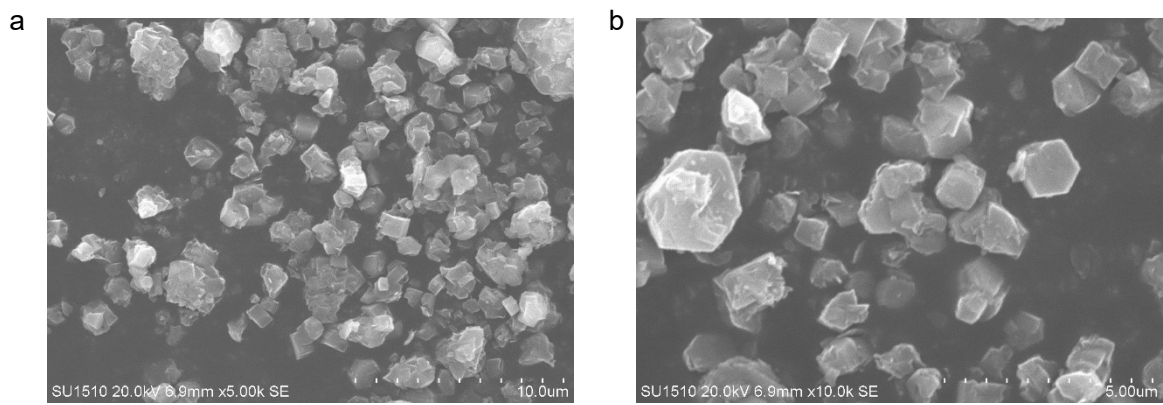

**Figure S14.** SEM images of Zn/*meso*-ZSM-5 zeolite.

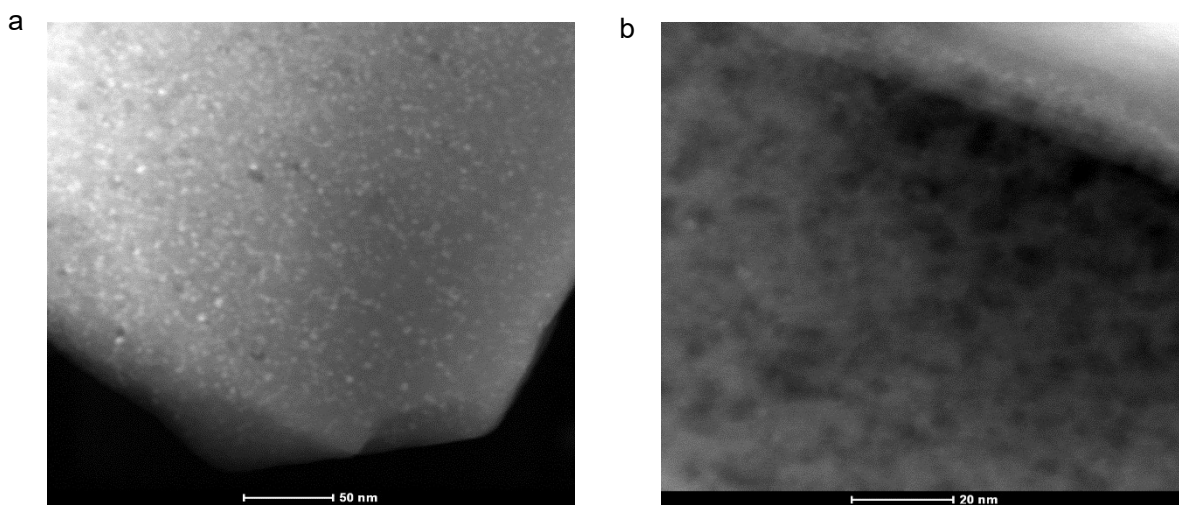

**Figure S15.** STEM images of (a,b) Zn/*meso*-ZSM-5 zeolite.

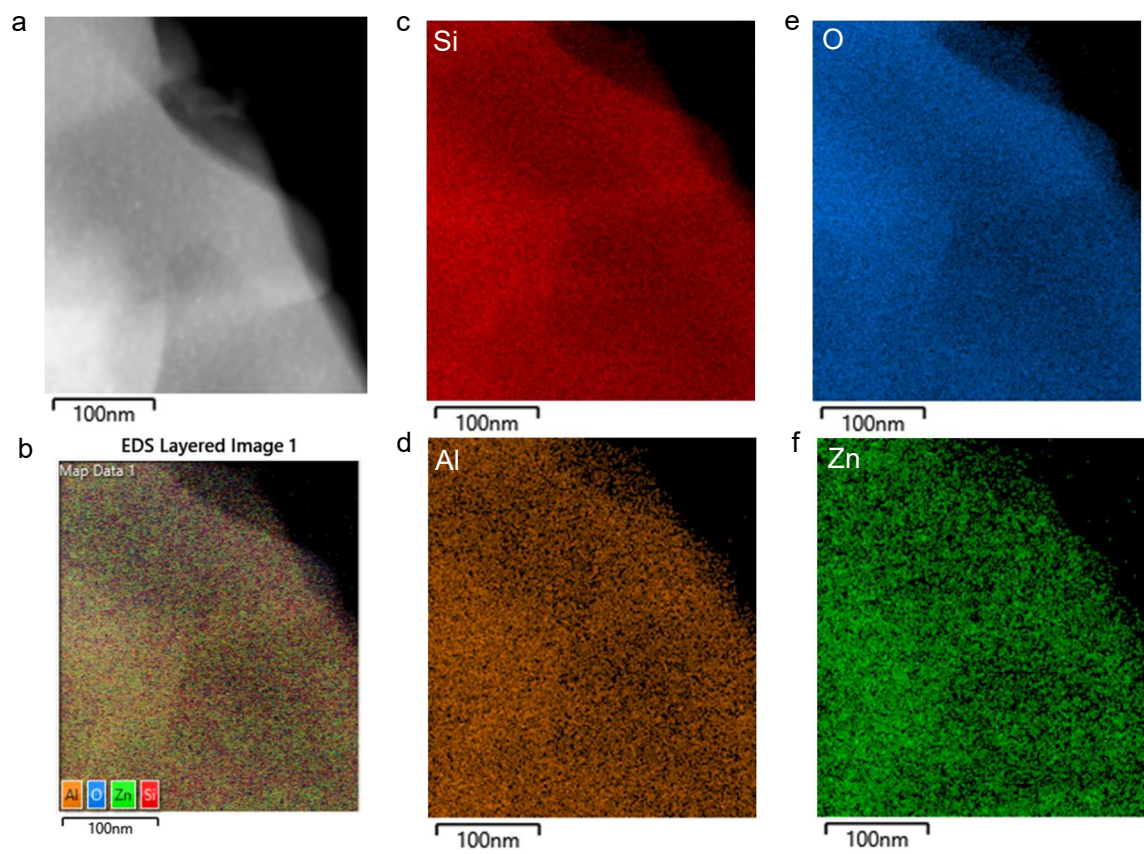

**Figure S16.** (a) STEM, (b) EDS, (c) Si, (d) Al, (e) O, and (f) Zn elemental maps of Zn/meso-ZSM-5.

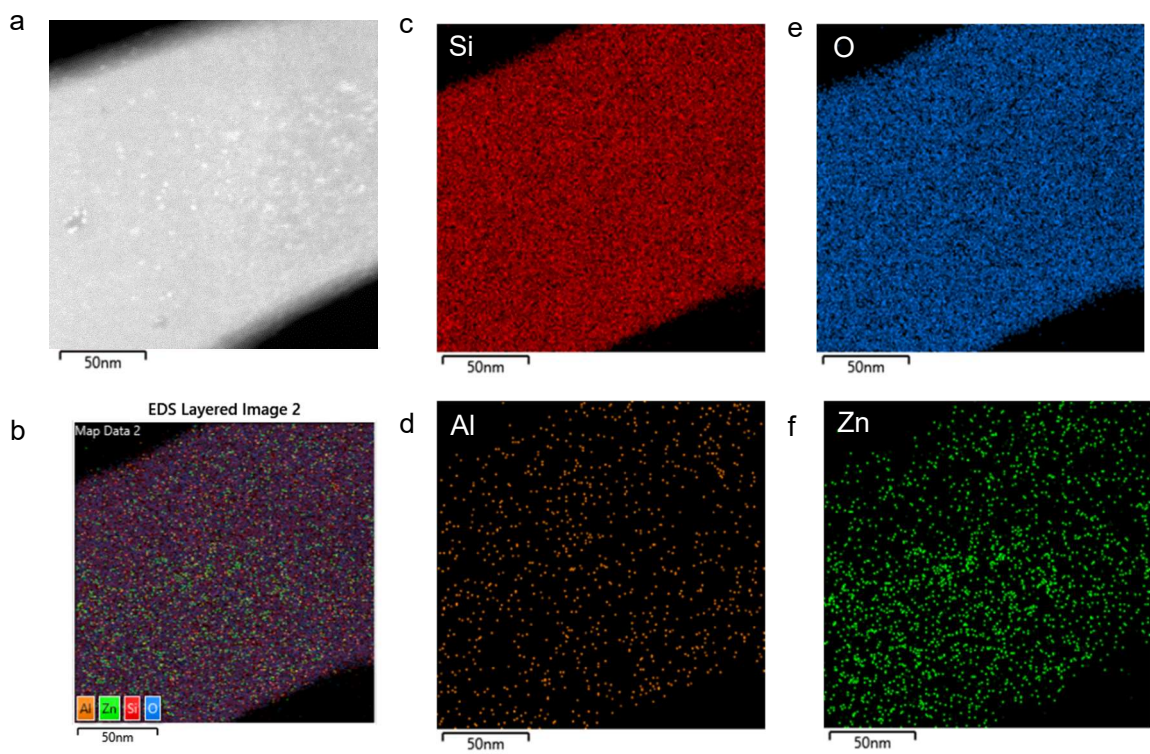

**Figure S17.** (a) STEM, (b) EDS, (c) Si, (d) Al, (e) O, and (f) Zn elemental maps of the Zn/s-ZSM-5.

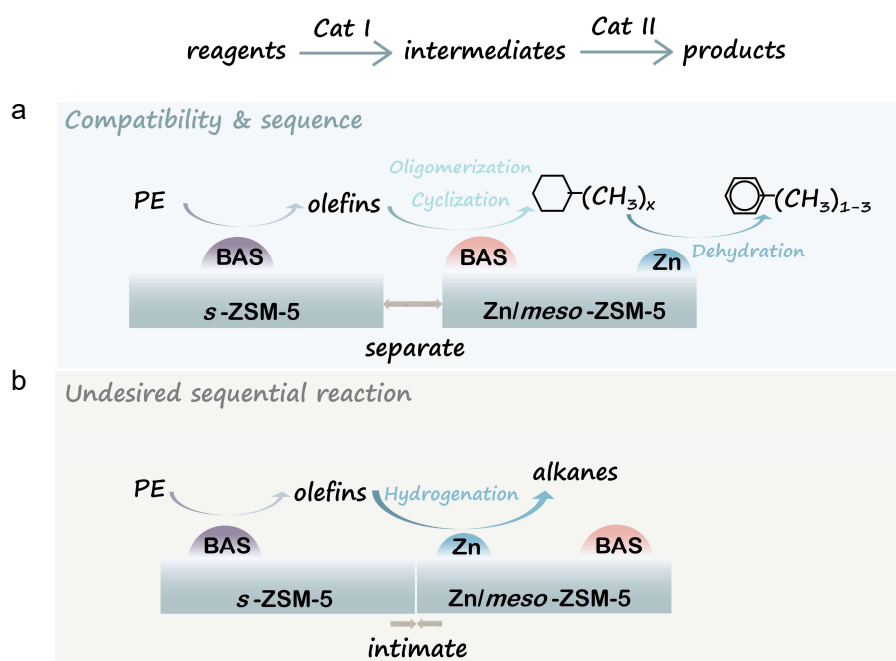

**Figure S18.** The distance required for efficient synergism between *s*-ZSM-5 and Zn/*meso*-ZSM-5.

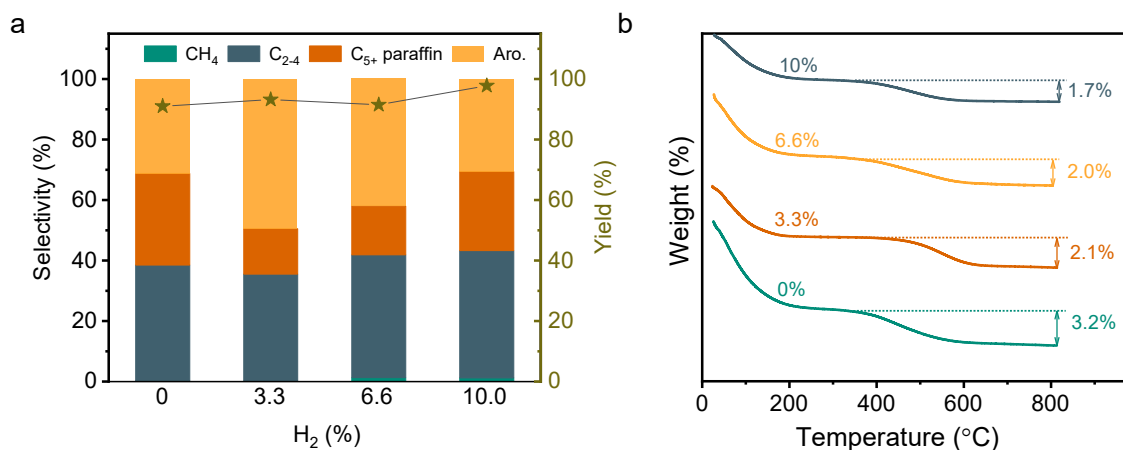

**Figure S19.** (a) Data characterization of the aromatization of PE over *s*-ZSM-5 and Zn/*meso*-ZSM-5 zeolite with different hydrogen content in the carrier gas. (b) TG profiles of the spent Zn/*meso*-ZSM-5 with different hydrogen content in the carrier gas. Reaction conditions: the mixture of 500 mg of PE and 100 mg of *s*-ZSM-5 in the first bed, 400 mg of Zn/*meso*-ZSM-5 for aromatization in the second bed, a flow rate of 3 mL/min, 400 °C, 4 h.

**Note:** Hydrogen is important for the reaction. In our previous study on *s*-ZSM-5 catalyzed PE conversion, the function of hydrogen has been experimentally and theoretically studied, which participate in the C-C cracking reaction and hindered the formation of the bulky molecule and polycyclic species in the micropores to ensure the free micropores for continuous reaction and diffusion, which is efficient to hinder the formation of coke/oligomers that benefit the rapid mass transfer during catalysis. In addition, involving hydrogen in the feed has been used to hinder the coke formation in different reactions, such as MTO and STO.<sup>14-19</sup>

We performed the reaction using inert gas without hydrogen, and the hydrogen/nitrogen mixture with different hydrogen concentrations. As shown in figure S19, the reaction with inert nitrogen without hydrogen resulted in obviously reduced yields of aromatics. With 3.3 and 6.6% of hydrogen in the feed, the yield of aromatics was obviously higher than that in the hydrogen-free test. When 10% of hydrogen was used, the yields of aromatics were much lower with the formation of abundant light gases and C<sub>5+</sub> alkanes, which might be due to the enhanced hydrogenation reaction that reduced the olefins into alkanes to hinder the aromatization. In addition, with the hydrogen participating in the reaction, the carbon deposition decreased significantly (Figure S19b).

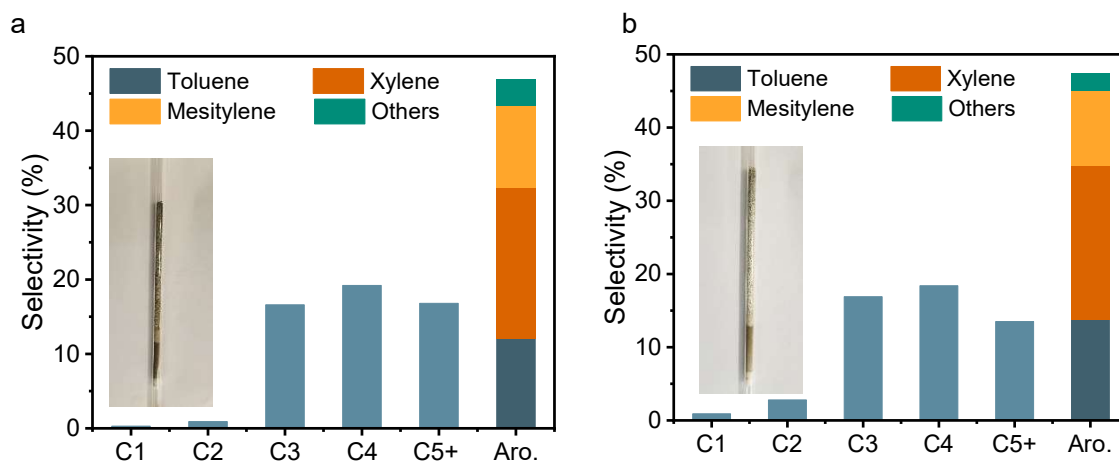

**Figure S20.** (a) Data characterization of the aromatization of the mixture of PE and PVC Reaction conditions: the mixture of 500 mg of PE, 50 mg of PVC, and 100 mg of *s*-ZSM-5 in the first bed, 400 mg of Zn/*meso*-ZSM-5 for aromatization in the second bed, feed gas of 3.3% H<sub>2</sub>/29.7% Ar/67% N<sub>2</sub>, a flow rate of 3 mL/min, 400 °C, and reaction for 4 h. (b) Data characterization of the aromatization of PE with inducing water over Zn/*meso*-ZSM-5. Reaction conditions: the mixture of 500 mg of PE and 100 mg of *s*-ZSM-5 in the first bed, 400 mg of Zn/*meso*-ZSM-5 for aromatization in the second bed, feed gas of 3.3% H<sub>2</sub>/29.7% Ar/67% N<sub>2</sub>, a flow rate of 3 mL/min, 400 °C, 4 h.

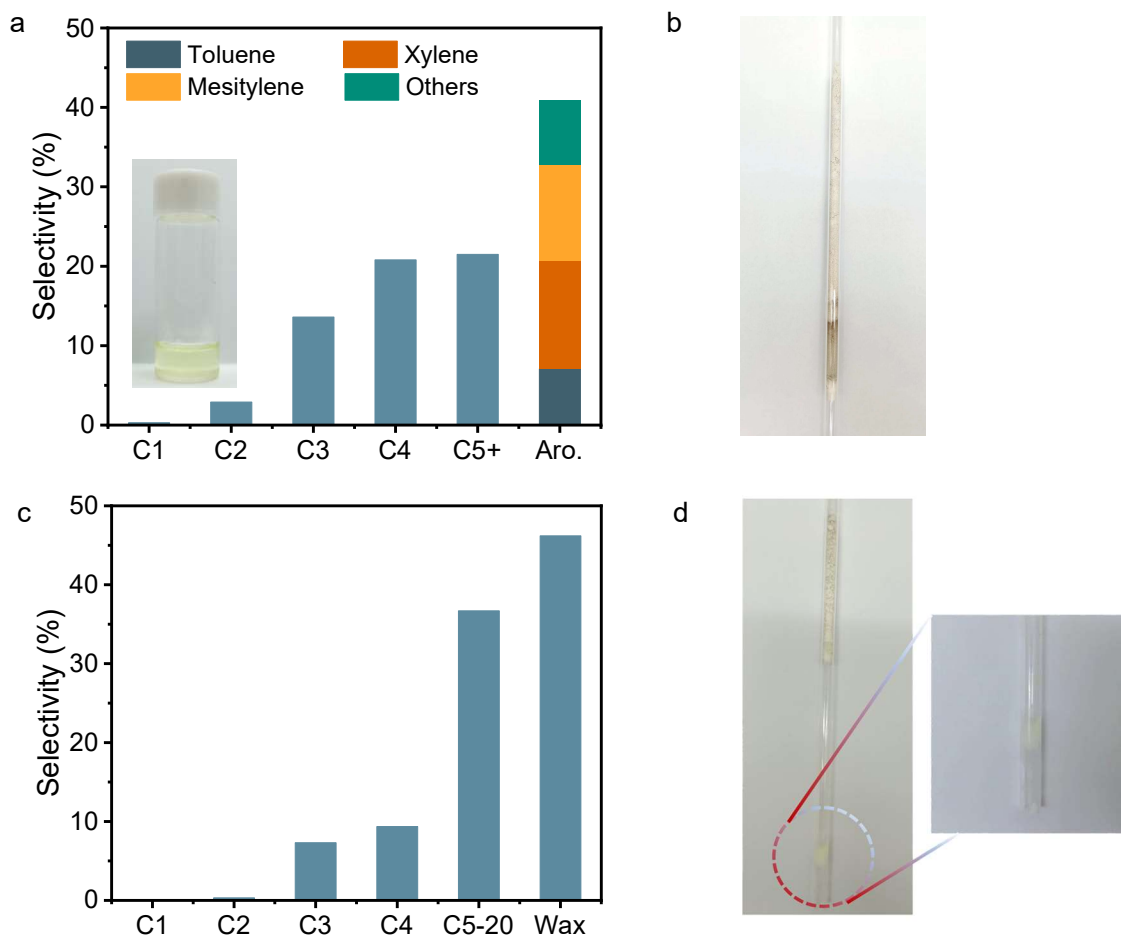

**Figure S21.** (a) Data characterization of the aromatization of PP over *s*-ZSM-5 and Zn/*meso*-ZSM-5. (b) Photograph showing the spent *s*-ZSM-5 and Zn/*meso*-ZSM-5. Reaction conditions: a mixture of 500 mg of PP and 100 mg of *s*-ZSM-5 in the first bed, 400 mg of Zn/*meso*-ZSM-5 for aromatization in the second bed, feed gas of 3.3% H<sub>2</sub>/29.7% Ar/67% N<sub>2</sub>, a flow rate of 3 mL/min, 400 °C, and reaction for 4 h. (c) Data characterizing the performance of *s*-ZSM-5 in PP depolymerization. (d) Photograph showing the spent *s*-ZSM-5 in the conversion of PP. Reaction conditions: a mixture of 500 mg of PP and 100 mg of *s*-ZSM-5, feed gas of 3.3% H<sub>2</sub>/29.7% Ar/67% N<sub>2</sub>, a flow rate of 3 mL/min, 400 °C, 4 h.



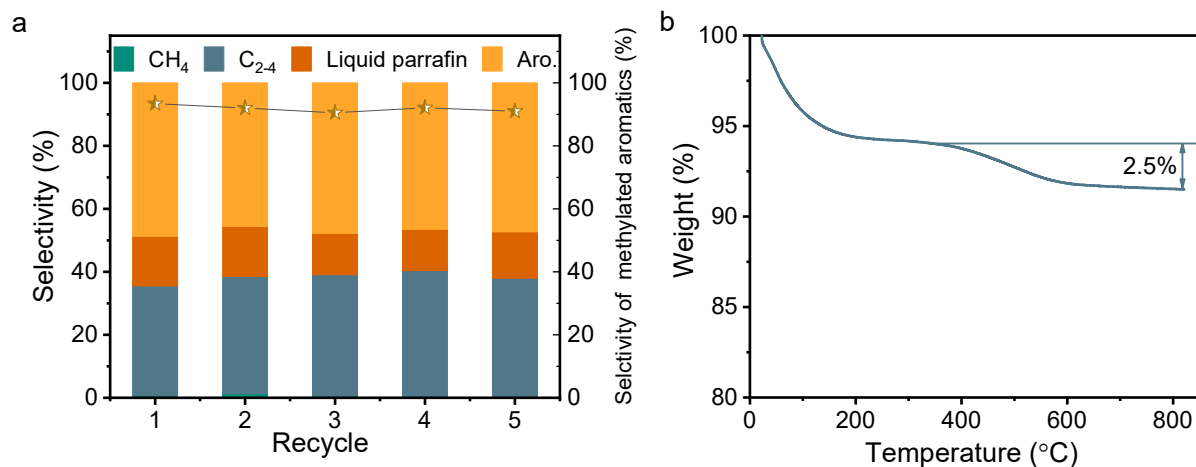

**Figure S22.** (a) Data characterization of the recyclability in polyethylene aromatization over *s*-ZSM-5 and Zn/*meso*-ZSM-5. Reaction conditions: the mixture of 500 mg of PE and 100 mg of *s*-ZSM-5 in the first bed, 400 mg of Zn/*meso*-ZSM-5 for aromatization in the second bed, feed gas of 3.3% H<sub>2</sub>/29.7% Ar/67% N<sub>2</sub>, a flow rate of 3 mL/min, 400 °C, and reaction for 4 h.

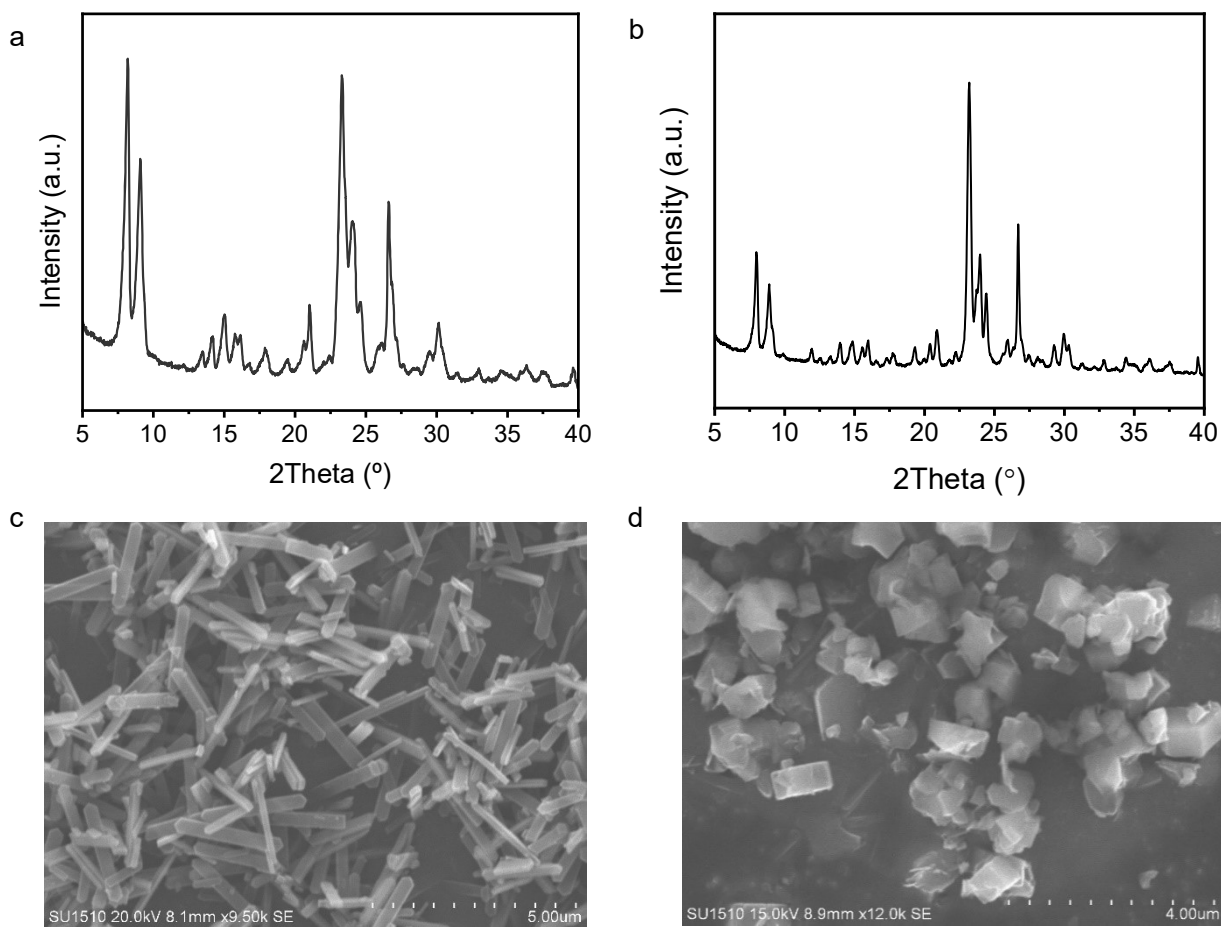

**Figure S23.** (a) XRD patterns and (c) SEM image of the spent *s*-ZSM-5 after 5 cycles. (b) XRD patterns and (d) SEM image of the spent *meso*-ZSM-5 after 5 cycles.

**Table S1.** Textural properties of ZSM-5 before and after treatment with different concentrations of aqueous NaOH solution.

| Alkali concentration<br>(mol/L) | $S_{\text{BET}}$<br>( $\text{m}^2/\text{g}$ ) | $S_{\text{meso}}$<br>( $\text{m}^2/\text{g}$ ) | $V_{\text{micro}}$<br>( $\text{cm}^3/\text{g}$ ) | $V_{\text{meso}}$<br>( $\text{cm}^3/\text{g}$ ) | $D_{\text{meso}}$<br>(nm) |
|---------------------------------|-----------------------------------------------|------------------------------------------------|--------------------------------------------------|-------------------------------------------------|---------------------------|
| 0                               | 327.7                                         | 78.6                                           | 0.12                                             | 0.02                                            | 2.6                       |
| 0.2                             | 370.9                                         | 94.1                                           | 0.13                                             | 0.07                                            | 5.6                       |
| 0.5                             | 408.1                                         | 107.3                                          | 0.14                                             | 0.17                                            | 5.8                       |
| 0.8                             | 418.9                                         | 145.9                                          | 0.11                                             | 0.36                                            | 6.4                       |

The mesoporous surface area was evaluated by the  $t$ -plot method. Pore volume for micropores and mesopores were evaluated by the  $t$ -plot method and BJH method, respectively. The mean pore diameter for mesopores was evaluated by the BJH method.

**Table S2.** Data characterization of polyethylene depolymerization over *s*-ZSM-5 and aromatization over *s*-ZSM-5 and Zn/*meso*-ZSM-5.

| Catalyst                                   | Yield of total product (%) | Selectivity (%) |                |                             |                |                             |                |                             |                 |                              |      |
|--------------------------------------------|----------------------------|-----------------|----------------|-----------------------------|----------------|-----------------------------|----------------|-----------------------------|-----------------|------------------------------|------|
|                                            |                            | CH <sub>4</sub> | C <sub>2</sub> | C <sub>2</sub> <sup>=</sup> | C <sub>3</sub> | C <sub>3</sub> <sup>=</sup> | C <sub>4</sub> | C <sub>4</sub> <sup>=</sup> | C <sub>5+</sub> | C <sub>5+</sub> <sup>=</sup> | Aro. |
| <i>s</i> -ZSM-5                            | 87.5                       | 0.1             | 0.3            | 1.4                         | 0.8            | 14.2                        | 2.9            | 25.4                        | 12.6            | 23.4                         | 18.9 |
| <i>s</i> -ZSM-5+<br>Zn/ <i>meso</i> -ZSM-5 | 93.2                       | 0.1             | 2.5            | 0.5                         | 13.4           | 2.7                         | 12.9           | 3.4                         | 11.2            | 3.8                          | 49.5 |

Reaction conditions: feed gas of 3.3% H<sub>2</sub>/29.7% Ar/67% N<sub>2</sub>, a flow rate of 3 mL/min, 400 °C, 4h.

**Table S3.** Benson group increments for various sub-groups.

| Group label    | Chemical identity                | $\Delta_r H_{\text{gas,est}}^{\circ}$ (kJ mol <sup>-1</sup> ) | $S_{\text{gas,est}}^{\circ}$ ( $\times 10^{-3}$ kJ mol <sup>-1</sup> K <sup>-1</sup> ) |
|----------------|----------------------------------|---------------------------------------------------------------|----------------------------------------------------------------------------------------|
| g <sub>1</sub> | -CH <sub>2</sub> -               | -21.0                                                         | 39.4                                                                                   |
| g <sub>2</sub> | -CH <sub>3</sub>                 | -42.7                                                         | 127.2                                                                                  |
| g <sub>3</sub> | =CH <sub>2</sub>                 | 26.2                                                          | 33.4                                                                                   |
| g <sub>4</sub> | =CH-C                            | 35.9                                                          | 42.7                                                                                   |
| g <sub>5</sub> | CH <sub>2</sub> -C=C             | -20                                                           | 41.0                                                                                   |
| g <sub>6</sub> | C <sub>Ar</sub> -CH <sub>3</sub> | 23.0                                                          | -32.1                                                                                  |
| g <sub>7</sub> | C <sub>Ar</sub> -H               | 14.0                                                          | 48.2                                                                                   |
| g <sub>8</sub> | Ring strain<br>correction        | 3.0                                                           | -25.0                                                                                  |
| g <sub>H</sub> | H <sub>2</sub>                   | 0                                                             | 130.7                                                                                  |

**Table S4.** Data characterization of polyethylene aromatization over various catalysts in Figure 1a.

| Catalyst                                   | Solid (%) | Yield of total product (%) | Selectivity (%) |                |                |                |                 | Selectivity of C <sub>5+</sub> (%) |      |
|--------------------------------------------|-----------|----------------------------|-----------------|----------------|----------------|----------------|-----------------|------------------------------------|------|
|                                            |           |                            | CH <sub>4</sub> | C <sub>2</sub> | C <sub>3</sub> | C <sub>4</sub> | C <sub>5+</sub> | Olefins and alkanes                | Aro. |
| <i>s</i> -ZSM-5                            | 12.5      | 87.5                       | 0.1             | 1.7            | 15.0           | 28.3           | 54.9            | 65.5                               | 34.5 |
| <i>n</i> -ZSM-5                            | 25.7      | 74.3                       | 0.2             | 1.5            | 13.2           | 17.6           | 67.5            | 54.9                               | 45.1 |
| Zn/ <i>n</i> -ZSM-5                        | 22.7      | 78.3                       | 0.3             | 1.5            | 13.8           | 21.2           | 63.2            | 47.5                               | 52.5 |
| <i>s</i> -ZSM-5 and Zn/ZSM-5*              | 7.9       | 92.1                       | 0.2             | 2.1            | 17.9           | 23.5           | 56.3            | 54.1                               | 45.9 |
| <i>s</i> -ZSM-5 and Zn/ZSM-5               | 11.3      | 88.7                       | 0.1             | 1.8            | 18.2           | 23.6           | 56.3            | 39.6                               | 60.4 |
| <i>s</i> -ZSM-5 and Zn/ <i>meso</i> -ZSM-5 | 6.8       | 93.2                       | 0.1             | 3.0            | 16.1           | 16.3           | 64.5            | 23.3                               | 76.7 |
| <i>s</i> -ZSM-5 and Zn/ <i>s</i> -ZSM-5    | 19.7      | 70.3                       | 0.1             | 2.0            | 14.4           | 25.0           | 58.5            | 51.1                               | 48.9 |

**Table S5.** Data characterization of polyethylene aromatization over various catalysts in Figure 4c.

| Entry <sup>a</sup> | Catalyst                                         | Temp. (°C) | Yield of methylated aromatics (%) | Reference |
|--------------------|--------------------------------------------------|------------|-----------------------------------|-----------|
| 1                  | ZSM-5                                            | 700        | 35.1                              | 20        |
| 2                  | Fly ash                                          | 700        | 22.1                              | 21        |
| 3                  | ZnCl <sub>2</sub>                                | 500        | 12.6                              | 22        |
| 4                  | H <sub>3</sub> PO <sub>4</sub> -Activated Carbon | 600        | 23.8                              | 23        |
| 5                  | -                                                | 600        | 18.2                              | 24        |
| 6                  | Spent FCC catalyst                               | 400        | 8.7                               | 25        |
| 7                  | ZSM-5 modification with boron                    | 590        | 24.6                              | 26        |
| 8                  | Sewage sludge derived char catalyst              | 600        | 14.0                              | 27        |
| 9                  | Activated carbons                                | 500        | 24.7                              | 28        |
| 10                 | Zn-ZSM-11                                        | 500        | 29.2                              | 29        |
| 11                 | Zn-activated carbons                             | 526        | 32.0                              | 30        |
| 12                 | H-Gallosilicate                                  | 425        | 15.4                              | 31        |
| 13                 | Ni-ZSM-5                                         | 550        | 30.5                              | 32        |
| 14                 | activated carbon                                 | 600        | 20.0                              | 33        |
| 15                 | -                                                | 730        | 22.9                              | 34        |
| 16                 | CaO and Ga/ZSM-5                                 | 500        | 29.2                              | 35        |
| 17                 | HZSM5                                            | 450        | 9.1                               | 36        |
| 18                 | HUSY                                             | 550        | 19.3                              | 37        |
| 19                 | activated carbon                                 | 750        | 22.0                              | 38        |
| 20                 | HZSM-5                                           | 500        | 10.0                              | 39        |
| 21                 | ZSM-5                                            | 450        | 27.7                              | 40        |
| 22                 | HZSM-5                                           | 500        | 22.0                              | 41        |
| 23                 | CaO                                              | 719        | 18.0                              | 42        |
| 24                 | ZSM-5                                            | 500        | 10.0                              | 43        |
| 25                 | -                                                | 850        | 30.0                              | 44        |
| 26                 | -                                                | 850        | 12.9                              | 45        |
| 27                 | HUSY                                             | 600        | 6.9                               | 46        |
| 28                 | -                                                | 700        | 22.0                              | 47        |
| 29                 | -                                                | 700        | 7.0                               | 48        |
| 30                 | Ga loaded HZSM-5                                 | 500        | 20.4                              | 49        |
| 31                 | Co-pyrolysis                                     | 500        | 10.0                              | 50        |
| 32                 | Conical spouted bed reactor                      | 700        | 10.0                              | 51        |

<sup>a</sup> The entries in Table S5 correspond to the numbers in Figure 4c in the main text.

## Reference

1. S. W. Benson, F. R. Cruickshank, D. M. Golden, G. R. Haugen, H. E. O'Neal, A. S. Rodgers, R. Shaw and R. Walsh, *Chem. Rev.*, 1969, **69**, 279-324.
2. F. Zhang, M. Zeng, R. D. Yappert, J. Sun, Y. -H. Lee, A. M. LaPointe, B. Peters, M. M. Abu-Omar and S. L. Scott, *Science*, 2020, **370**, 437-441.
3. Y. Chung, F. H. Vermeire, H. Wu, P. J. Walker, M. H. Abraham and W. H. Green, *Journal of Chemical Information and Modeling*, 2022, **62**, 433-446.
4. J. Kang, K. Cheng, L. Zhang, Q. Zhang, J. Ding, W. Hua, Y. Lou, Q. Zhai and Y. Wang, *Angew. Chem. Int. Ed.* 2011, **50**, 5200-5203.
5. B. Zhao, P. Zhai, P. Wang, J. Li, T. Li, M. Peng, M. Zhao, G. Hu, Y. Yang, Y. -W. Li, Q. Zhang, W. Fan and D. Ma, *Chem*, 2017, **3**, 323-333.
6. Y. Li, S. Liu, Z. Zhang, S. Xie, X. Zhu and L. Xu, *Appl. Catal. A*, 2008, **338**, 100-113.
7. M. Bjørgen, F. Joensen, M. S. Holm, U. Olsbye, K. -P. Lillerud and S. Svelle, *Appl. Catal., A* 2008, **345**, 43-50.
8. Y. Song, X. Zhu, Y. Song, Q. Wang and L. Xu, *Appl. Catal. A*, 2006, **302**, 69-77.
9. J. Liang, L. Guo, W. Gao, C. Wang, X. Guo, Y. He, G. Yang and N. Tsubaki, *Ind. Eng. Chem. Res.*, 2022, **61**, 10336-10346.
10. X. Chen, Z. An, Y. Wang, Q. Ma, X. Feng, Y. Liu and C. Yang, *Fuel*, 2021, **290**, 119798.
11. Y. Fang, F. Yang, X. He and X. Zhu, *Front. Chem. Sci. Eng.*, 2019, **13**, 543-553.
12. N. Xu, D. Pan, Y. Wu, S. Xu, L. Gao, J. Zhang and G. Xiao, *React. Kinet. Mech. Catal.*, 2019, **127**, 449-467.
13. F. Zhou, Y. Gao, H. Ma, G. Wu and C. Liu, *Mol. Catal.*, 2017, **438**, 37-46.
14. S. S. Arora, D. L. S. Nieskens, A. Malek and A. Bhan, *Nature Catal.*, 2018, **1**, 666-672.
15. S. Lin, Y. Zhi, W. Zhang, X. Yuan, C. Zhang, M. Ye, S. Xu, Y. Wei and Z. Liu, *Chin. J. Catal.*, 2023, **46**, 11-27.
16. Y. Ni, Y. Liu, Z. Chen, M. Yang, H. Liu, Y. He, Y. Fu, W. Zhu and Z. Liu, *ACS Catal.*, 2019, **9**, 1026-1032.
17. S. S. Arora, Z. Shi and A. Bhan, *ACS Catal.*, 2019, **9**, 6407-6414.
18. X. Zhao, J. Li, P. Tian, L. Wang, X. Li, S. Lin, X. Guo and Z. Liu, *ACS Catal.*, 2019, **9**, 3017-3025.
19. M. DeLuca, C. Janes, and D. Hibbitts, *ACS Catal.*, 2020, **10**, 4593-4607.
20. P. Gaurh and H. Pramani, *Waste Manage.*, 2018, **71**, 86-96.
21. P. Gaurh and H. Pramani, *Waste Manage.*, 2018, **77**, 114-130.
22. K. Sun, Q. Huang, Y. Chi and J. Yan, *Waste Manage.*, 2018, **81**, 128-137.
23. K. Sun, Q. Huang, X. Meng, Y. Chi and J. Yan, *Energy Fuels*, 2018, **32**, 9772-9781.
24. S. -H. Jung, M. -H. Cho, B. -S. Kang and J. -S. Kim, *Fuel Process. Technol.*, 2010, **91**, 277-284.
25. K. -H. Lee, *Polymer Degradation and Stability*, 2008, **93**, 1284-1289.
26. G. Zhou, J. Li, Y. Yu, X. Li, Y. Wang, W. Wang and S. Komarneni, *Applied Catalysis A: General*, 2014, **487**, 45-53.
27. K. Sun, N. J. Themelis, A. C. Bourtsalas and Q. Huang, *Journal of Cleaner Production*, 2020, **268**, 122038.
28. Y. Zhang, D. Duan, H. Lei, E. Villota and R. Ruan, *Applied Energy*, 2019, **251**, 113337.
29. M. S. Renzini, U. Sedran and L. B. Pierella, *Journal of Analytical and Applied Pyrolysis*, 2009, **86**, 215-220.
30. Y. Uemichi, Y. Makino and T. Kanazuka, *Journal of Analytical and Applied Pyrolysis*, 1989, **14**, 331-344.
31. U. Yoshio and S. Toshihiro, *Chemistry Letters.*, 1999, **28**, 1137-1138.
32. S. Zhou, P. Li, H. Pan and Y. Zhang, *Ind. Eng. Chem. Res.*, 2022, **61**, 11407-11416.
33. D. Zhang, X. Lin, Q. Zhang, X. Ren, W. Yu and H. Cai, *Energy*, 2020, **212**, 118983.
34. W. Kaminsky and J. -S. Kim, *Journal of Analytical and Applied Pyrolysis*, 1999, **51**, 127-134.
35. L. Fu, Q. Xiong, Q. Wang, L. Cai, Z. Chen and Y. Zhou, *ACS Sustainable Chem. Eng.*, 2022, **10**, 9612-9623.



36. J. Aguado, D. P. Serrano, G. S. Miguel, M. C. Castro and S. Madrid, *Journal of Analytical and Applied Pyrolysis*, 2007, **79**, 415-423.
37. A. Marcilla, M. I. Beltrán and R. Navarro, *Applied Catalysis B: Environmental*, 2009, **86**, 78-86.
38. D. Duan, Z. Feng, X. Dong, X. Chen, Y. Zhang, K. Wan, Y. Wang, Q. Wang, G. Xiao, H. Liu and R. Ruan. *Energy*, 2021, **232**, 121090
39. G. Elordi, M. Olazar, G. Lopez, M. Artetxe and J. Bilbao, *Ind. Eng. Chem. Res.*, 2011, **50**, 6061-6070.
40. X. Zhang, H. Lei, G. Yadavalli, L. Zhu, Y. Wei and Y. Liu, *Fuel.*, 2015, **144**, 33-42.
41. C. Muhammad, J. A. Onwudili and P. T. Williams, *Energy Fuels*, 2015, **29**, 2601-2609.
42. M. -H. Cho, S. -H. Jung and J. -S. Kim, *Energy Fuels*, 2010, **24**, 1389-1395.
43. M. Artetxe, G. Lopez, M. Amutio, G. Elordi, J. Bilbao and M. Olazar, *Ind. Eng. Chem. Res.*, 2013, **52**, 10637-10645.
44. F. J. Mastral, E. Esperanza, C. Berruoco, M. Juste and J. Ceamanos, *Journal of Analytical and Applied Pyrolysis*, 2003, **70**, 1-17.
45. C. Berruoco, F. J. Mastral, E. Esperanza and J. Ceamanos, *Energy Fuels*, 2002, **16**, 1148-1153.
46. M. d. R. Hernández, Á. N. García and A. Marcilla, *Journal of Analytical and Applied Pyrolysis*, 2007, **78**, 272-281.
47. G. Grause, S. Matsumoto, T. Kameda and T. Yoshioka, *Ind. Eng. Chem. Res.*, 2011, **50**, 5459-5466.
48. M. L. Mastellone, F. Perugini, M. Ponte and U. Arena, *Polymer Degradation and Stability*, 2002, **76**, 479-487.
49. J. Song, J. Wang, Y. Pan, X. Du, J. Sima, C. Zhu, F. Lou and Q. Huang, *Journal of Environmental Management*, 2022, **322**, 116096
50. S. Uçar, A. R. Özkan and S. Karagöz, *Journal of Analytical and Applied Pyrolysis*, 2016, **119**, 233-241.
51. G. Elordi, M. Olazar, G. Lopez, M. Artetxe and J. Bilbao, *Ind. Eng. Chem. Res.*, 2011, **50**, 6650-6659.
